# Supplementary material
Source: publisher site journal article supplement (https://www.dovepress.com/article/414553)
Supplement: Supplementary file 1 [file get_supplementary_file.php]

**Supplement material**

Supplement Table 1. The specific contents of the MBSR interventions.

| **Time** | **Contents** |
| --- | --- |
| Day 1 | -Introduce the theoretical knowledge of MBSR program  -Explain the intervention process to patients in detail  -Give them a relaxation training instruction manual  -Lead them in experiential exercises  -Distribute the audio of "Safe Island" and practice it before naps and bedtime |
| Day 2 | -Review the "Safety Island" exercise  -Distribute the audio of "Relaxation Space", and practice before naps and bedtime. |
| Day 3 | -Conduct a new section of the practice: walking meditation  -Introduce techniques on how to meditate and use mindfulness in their daily lives. |
| Day 4 | -Review the walking meditation training  -Introduce the body scan exercise, and explain how to feel the feeling of the body at the moment and attempt to establish a close connection with the body  -Distribute the audio of "Body Scan" and "Ocean Meditation" to practice before naptime and bedtime |
| Day 5 | -Review of the body scan exercise  -Distribute the "Positive Movement" video to practice before naptime and bedtime |


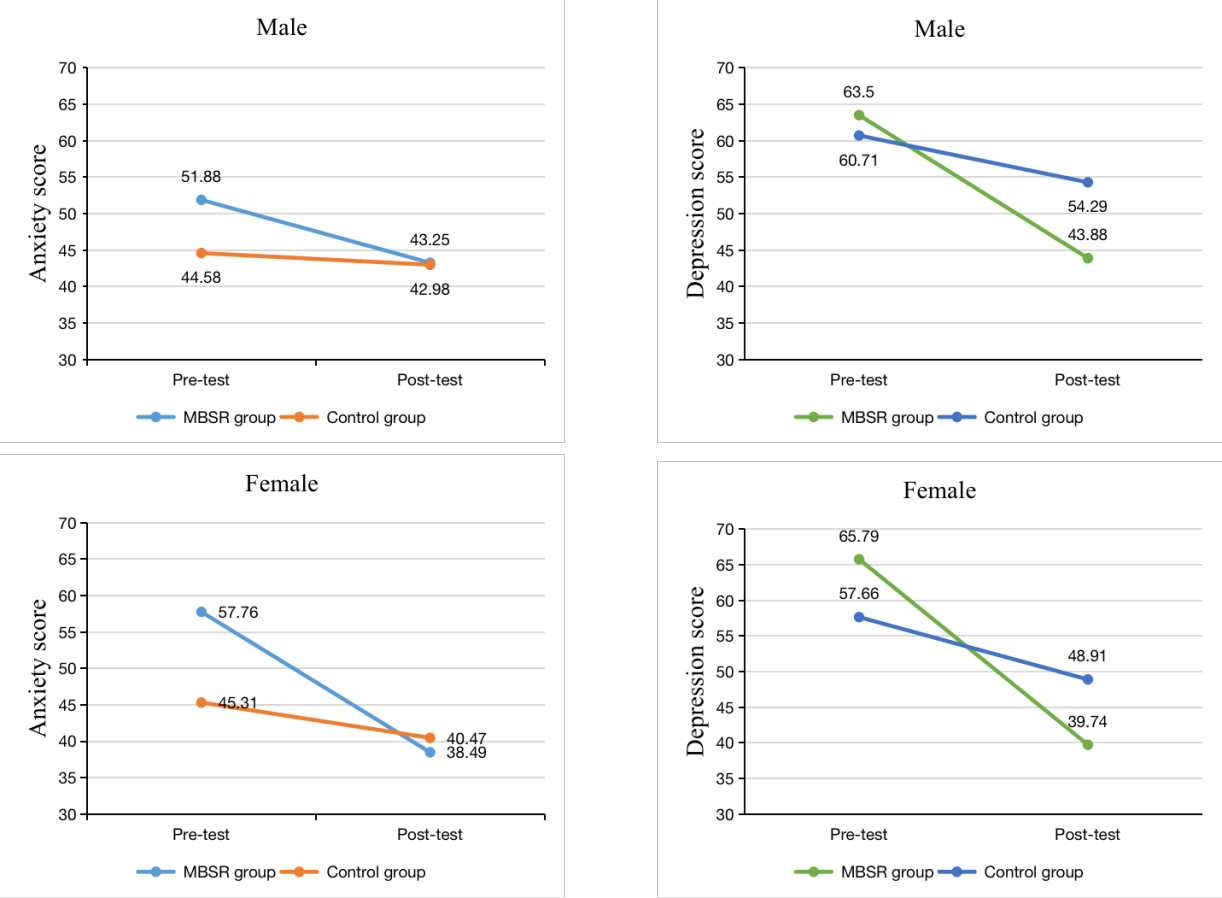


Supplement Figure 1. Group scores of the Anxiety and Depression at pre- and post-tests in sex subgroups.


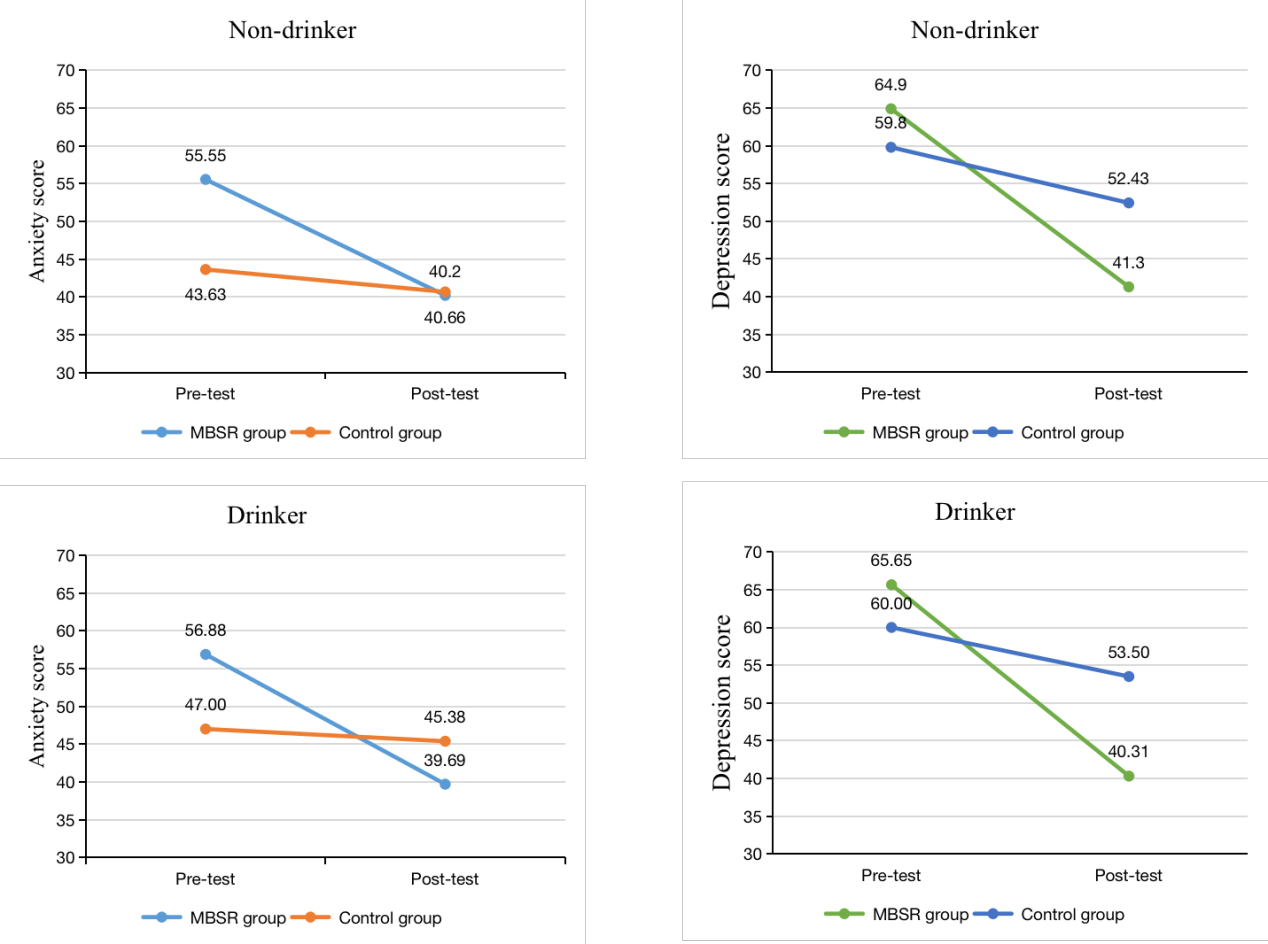


Supplement Figure 2. Group scores of the Anxiety and Depression at pre- and post-tests in drinking status subgroups.
